# Supplementary material for: Tomato brown rugose fruit virus resistance generated by quadruple knockout of homologs of TOBAMOVIRUS MULTIPLICATION1 in tomato
Source: PubMed Central journal article supplement — Plant Physiol. 2022 Mar 9;189(2):679–86. doi: 10.1093/plphys/kiac103 (PMC9157163; doi:10.1093/plphys/kiac103), 2022-03-09
Supplement: kiac103_supplementary_data.pdf [file kiac103_supplementary_data.pdf]

**Supplemental Data**

Tomato Brown Rugose Fruit Virus Resistance Generated by  
Quadruple Knockout of Homologs of *TOBAMOVIRUS*  
*MULTIPLICATION1* in Tomato

Masayuki Ishikawa<sup>1</sup>, Tetsuya Yoshida<sup>1</sup>, Momoko Matsuyama<sup>1</sup>, Yusuke Kouzai<sup>2</sup>, Akihito Kano<sup>3</sup>, Kazuhiro Ishibashi<sup>1</sup>

<sup>1</sup> Crop Disease Research Group and <sup>2</sup>Crop Stress Management Group, Division of Plant Molecular Regulation Research, Institute of Agrobiological Sciences, NARO, 2-1-2, Kannondai, Tsukuba, Ibaraki 305-8602, Japan

<sup>3</sup> Plant Breeding and Experiment Station, Takii and Company, Limited, Konan, Shiga 520-3231, Japan

**A**

```

SITOM1a 1:-MGRVETAVDPSSTAAVAAYRLHEAISWWDEVNESPIWQDR-IFYVLAILYGVVSAVALV 58
SITOM1b 1:MKVKSIFLLEFAKDYDDGTPRVRPIFDWDFNAMMEVSDYEKQAIIFYSLSAAYALVSFVALV 60
SITOM1c 1:-MARLPLGSSPIDIAG-----PVTNWWDHVNESVQWQDG-IFYSLCASYGLVSAVALI 51
SITOM1d 1:-MGRAEMVVGPESEKVAVVAYHLNDAINWDDVNRSLDWQNR-IFHVLAIVLYGVVAVVALV 58
      . . . . . * * . . . . . * * . . . . . * * . . . . .
      . . . . . * * . . . . . * * . . . . . * * . . . . .

SITOM1a 59:QLIRIQMRVPEYGWTTQKVFHFLNFLVNGVRSLVFVFRRDVQKLNPEIIQHILLDMP SLA 118
SITOM1b 61:QLIRIQRLRLSGIGWTTQKVFHLMNFVVCGLRAILFGFYSSVFNLRSKALEMMLLDLPGLL 120
SITOM1c 52:QLIRIDLRLVPEYGWTTQKVFHLMNFVNGVRAIVFGFHKHVFLLHYKVLTLAILDLPGLL 111
SITOM1d 59:QLIRIQMRVPEYGWTTQKVFHFLNFFVNGVRSLVTFRRRDVQKLNPEIVQHIMLDMP SLA 118
      * * * * * . * . . . . * * * * * . * * * * * . * * * * * . * * * * *

SITOM1a 119:FFTTFALLVLFWAEIYYQARAVSTDALRPSFFT INGVVYAIQIILWLIWVKPVPVLVIL 178
SITOM1b 121:FFSYTLLVLFWAEIYHQARNLPIDKLRPAYAVNAVYVFIQICIWIFIGVGPASA AVET 180
SITOM1c 112:FFSYTLLVLFWAEIYHQARSLPTDKLRISYIAINDAIYFIQACIWVYLWINDNSTVEFI 171
SITOM1d 119:FFTTFALLVLFWAEIYYQARAVSTDGLRPSFFT INGVVYAIQIILWLIWVKPIRVLFIL 178
      * * * * * * * * * * * * * * * * * * * * * * * * * * * * * * * * * * * * *

SITOM1a 179:SKAFFAGVSLFAALGFLLYGGRLFLMLRRFPVE SRGRQKKLQEVGYVTITICFSCFLIRCI 238
SITOM1b 181:AKLFFAVISFTAALGFVYGGRLFAMLRFPFIE SRGRQKKLHEVGFVTGICICCFMIRCV 240
SITOM1c 172:GKIFMAVVS VIAALGFLLYGGRLFLMLRRFPFIE SKGRRKKLHEVGSVTAICFTCFILIRCV 231
SITOM1d 179:SKMFFAGVSLFAALGFLLYGGRLFLMLQRFPVE SRGRRKKLQEVGYVTITICFSCFLIRCV 238
      * * * * * * * * * * * * * * * * * * * * * * * * * * * * * * * * * * * * *

SITOM1a 239:MMC FNAFDKAADLDVLYHPMLNFVYLLVEILPSSLVLFILRKLP PPKGITQYHPIR 295
SITOM1b 241:MVAVSAFNGNADVDVIDHPVLILFYVYVVEILPSVLVLFILRKLP PKRVSQYHPIQ 297
SITOM1c 232:VVVLSAFDS DASLDVLDHPVLNLIYYLLVEILPSALVLYILRKLP PKRVSQYHPIS 288
SITOM1d 239:MMC FNAFDKAADLDVLYHPILNLIYYLLVEILPSSLVLFILRKLP PPKGITQYHPIH 295
      . . . . . * * . . . . . * * . . . . . * * . . . . . * * . . . . .

```

**B**

|         | SITOM1b          | SITOM1c          | SITOM1d          |
|---------|------------------|------------------|------------------|
| SITOM1a | 55%<br>(153/277) | 63%<br>(171/269) | 86%<br>(255/295) |
| SITOM1b |                  | 64%<br>(175/273) | 53%<br>(148/277) |
| SITOM1c |                  |                  | 62%<br>(169/269) |

**Supplemental Figure S1.** Comparison of amino acid sequences of SITOM1 proteins.

**A.** Alignment of amino acid sequences of SITOM1 proteins. Sequences were aligned using the Multiple Sequence Comparison by Log-Expectation algorithm provided in the GENETYX ver. 12 software. Amino acid residues identical among the four and three proteins are marked by asterisks and dots, respectively.

**B.** Identity of amino acid residues between SITOM1 proteins. Identity of amino acid residues (%) was calculated using the fastp program provided in the GENETYX ver. 12 software. The number of identical amino acid residues per the length of aligned regions are shown in parentheses.

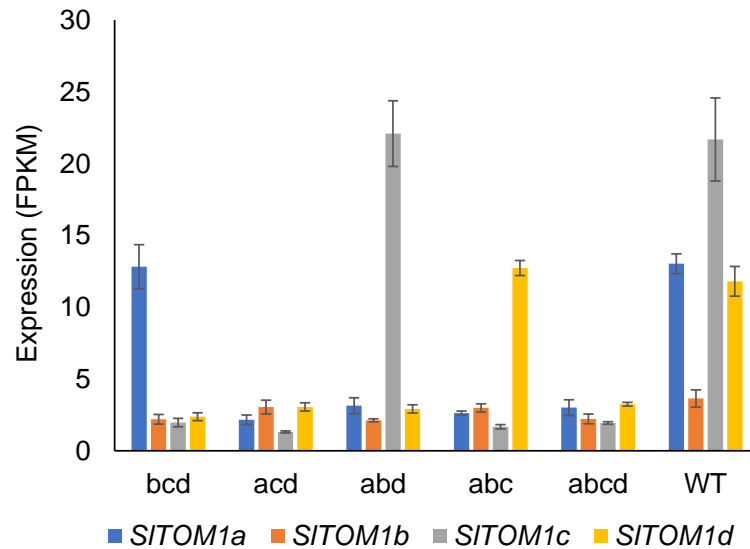

**Supplemental Figure S2.** Expression of *TOM1* homologs in wt, *Sltom1* quadruple-, and triple-mutant tomato plants.

RNAs extracted from leaves from each genotype were analyzed by RNA sequencing. Total RNA was extracted from young true leaves of tomato (19 days after imbibition) with RNAiso Plus (TaKaRa). Library preparation and RNA-seq analysis were carried out by BGI GENOMICS. Briefly, poly(A)<sup>+</sup> RNA was purified by oligo dT selection. The poly(A)<sup>+</sup> RNA was fragmented and first-strand cDNA was synthesized using random N6 oligo DNA as primers, followed by a second-strand cDNA synthesis with dUTP. The synthesized cDNA was subjected to end-repair and then was 3' adenylated. Adaptors were ligated to the ends of these 3' adenylated cDNA fragments, and the dUTP-marked second-strand cDNA was selectively degraded by Uracil-DNA-Glycosylase. Resultant single-stranded cDNA was used to prepare DNA nanoball (Drmanac et al. 2009. *Science*. 327: 78–81.) and sequenced using the DNBSEQ platform (paired end, sequence length: 150). Clean reads were obtained using the filtering software SOAPnuke (Chen et al. 2018. *Gigascience* 7: 1–6.), mapped to the reference genome (Species: *Solanum lycopersicum*\_4081; Reference Genome Version: GCF\_000188115.4\_SL3.0) using the Hierarchical Indexing for Spliced Alignment of Transcripts (HISAT) software (Kim et al. 2015. *Nature Methods* 12: 357–360.), and aligned to the reference genes using the Bowtie2 software (Langmead et al. 2012. *Nature Methods* 9: 357–359). Means  $\pm$  SEM of the numbers of fragments per kilobase of exon per million reads mapped (FPKM) from three independent plants are indicated. Small letters indicate the genes disrupted. WT: wild-type.

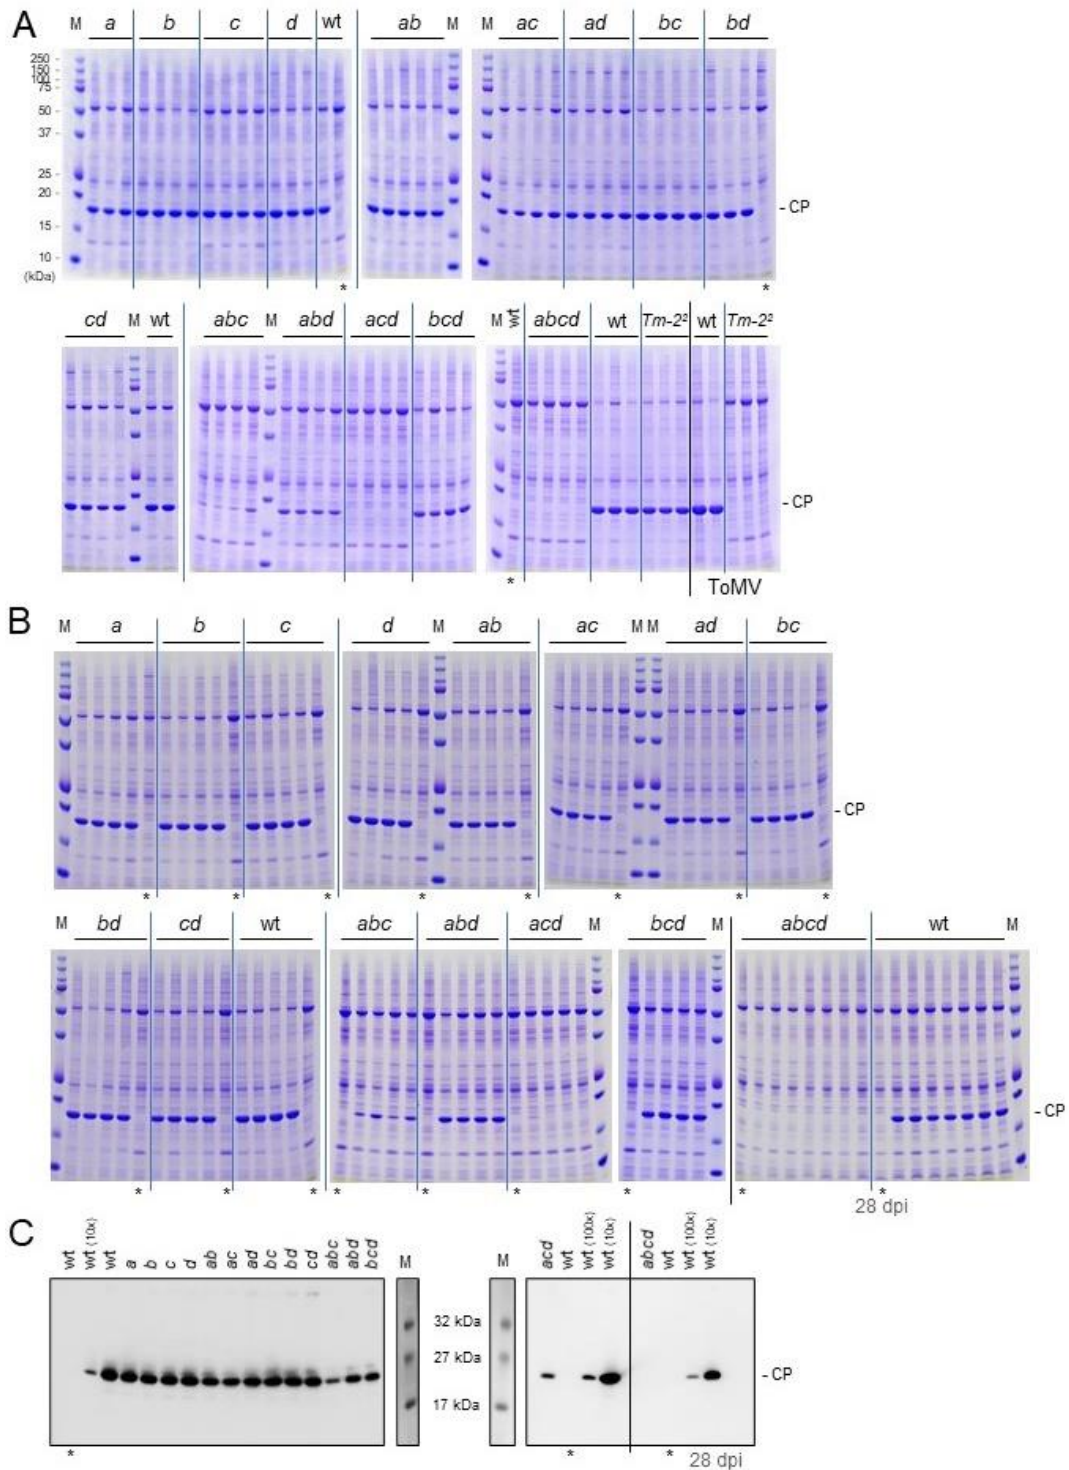

**Supplemental Figure S3.** ToBRFV CP accumulation in wt, *Sltom1* single-, double-, triple-, and quadruple-mutant and *Tm-2<sup>2</sup>* plants.

**A.** Whole Coomassie blue-stained gel images used to make Figure 2A. For details, refer to the legend to Figure 2A.

B. ToBRFV CP accumulation in another set of experiment. In *Sltom1* single-, double-, and triple mutants, CP accumulation in inoculated cotyledons at 7 dpi was analyzed. In *Sltom1* quadruple mutant, CP accumulation in uninoculated first true leaves of cotyledon-inoculated *Sltom1* quadruple-mutant plants at 28 dpi was analyzed (the gel marked with '28 dpi'). CP accumulation was analyzed and presented as in panel A.

C. Detection of ToBRFV CP by immunoblotting. For each *Sltom1* genotype (indicated above the blots; also see the legend to Figure 2A), equal volumes of the 4 protein samples appeared in panel B of this figure were mixed and CP accumulation was examined by SDS-PAGE (NuPAGE; Invitrogen, 12%) and immunoblotting using anti-ToBRFV antibody (AS1236, DSMZ). Samples prepared in parallel from non-inoculated plants were analyzed for comparison and are indicated by asterisks. Samples from ToBRFV-infected plants that were diluted 10-fold or 100-fold were simultaneously analyzed (marked with '10x' and '100x', respectively). From comparison of CP signal intensity, CP accumulation in *Sltom1abc* and *Sltom1acd* triple mutant plants was roughly estimated to be 10% and 1% of that in wild-type plants, respectively at 7 dpi. In *Sltom1abcd* quadruple mutant plants, CP was not detected also by immunoblotting (< 1% of CP accumulation in wild-type plants) at 28 dpi. M: DynaMarker Protein MultiColor (BioDynamics Laboratory Inc.). Positions of ToBRFV CP bands are indicated by 'CP'. Numbers represent approximate molecular masses of the marker proteins in kDa.



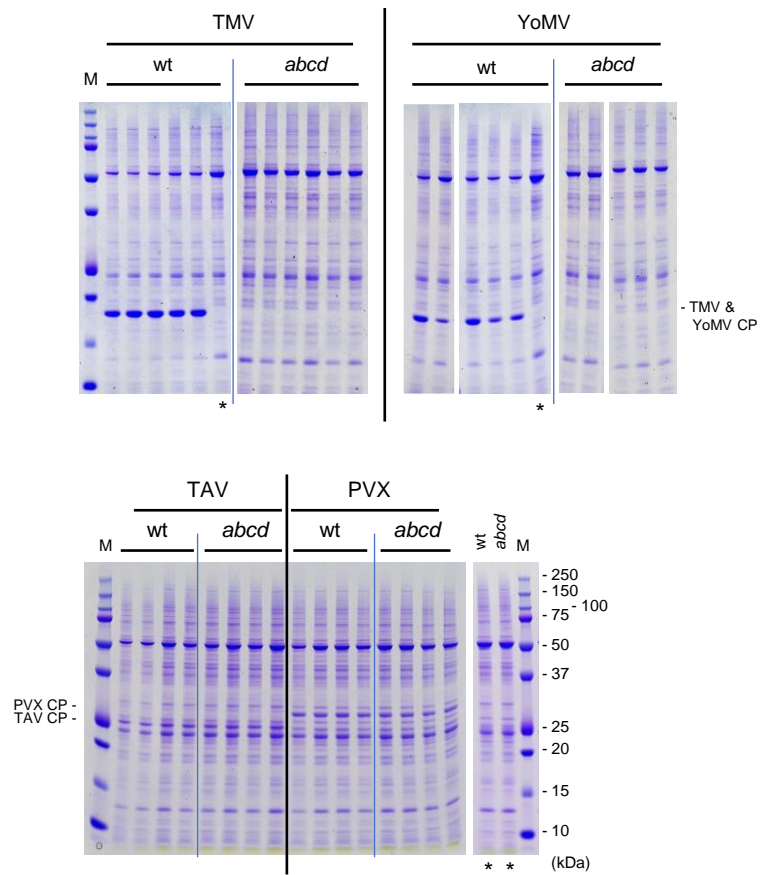

**Supplemental Figure S5.** TMV, YoMV, TAV, and PVX CP accumulation in wt and *Sltom1* quadruple-mutant plants. Whole Coomassie blue-stained gel images used to make Figure 3 are shown. For details, refer to the legend to Figure 3.

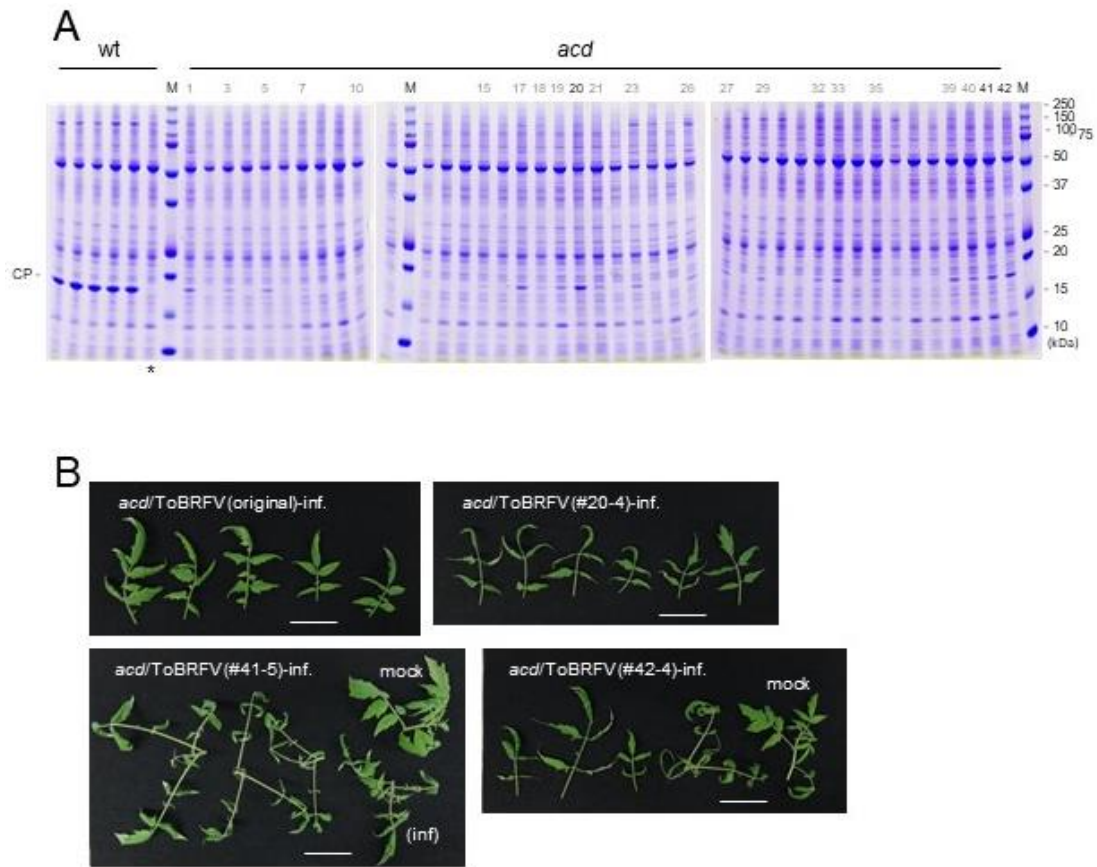

**Supplemental Figure S6.** Emergence of ToBRFV mutants in tomato *SltomIacd* triple-mutant plants.

A. ToBRFV coat protein (CP) accumulation in wild-type (wt) and *SltomIacd* triple-mutant (*acd*) plants. Upper uninoculated leaves of cotyledon-inoculated plants were harvested at 18 dpi, and CP accumulation was examined and presented as described in Figure 2A legend. Each lane represents an individual plant. A sample from a non-inoculated plant grown in parallel is shown for comparison (asterisk). *SltomIacd* plants corresponding to the numbered lanes accumulated the CP. M: Protein Marker Precision Plus Protein Dual Color Standards (Bio-Rad).

B. Upper uninoculated leaves of *SltomIacd* triple-mutant plants to which ToBRFV virions propagated in wild-type (original) or *SltomIacd* triple-mutant plants (#20-4, #41-5 and #42-4; see text) were inoculated. Photographs were taken at 22 dpi. Scale bars represent 5 cm.



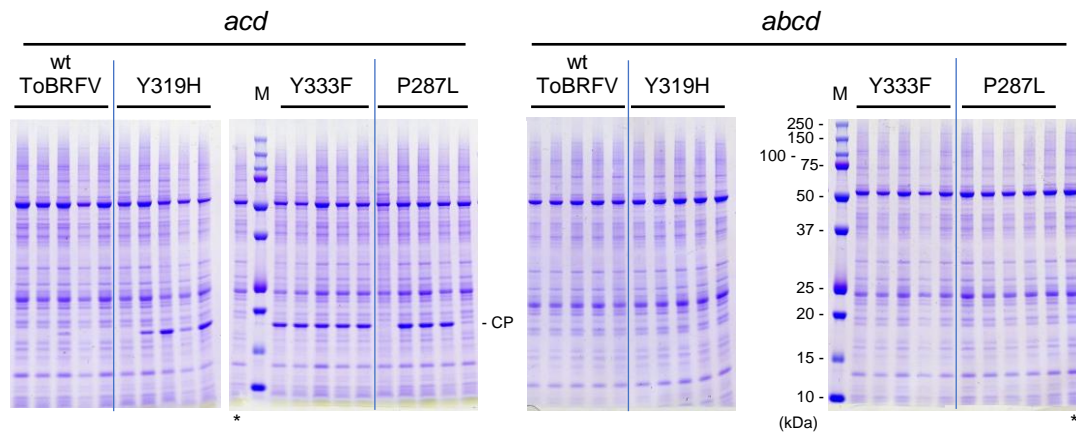

**Supplemental Figure S7.** CP accumulation of ToBRFV mutants in *Sltom1acd* triple-mutant and *Sltom1* quadruple-mutant plants. Whole Coomassie blue-stained gel images used to make Figure 4B are shown. For details, refer to the legend to Figure 4B.

**Supplemental Table 1. DNA oligonucleotides used to construct the sgRNA sequence-containing entry clones.**

| target gene            | orientation | sequence                 |
|------------------------|-------------|--------------------------|
| <i>SITOM1a &amp; d</i> | forward     | ATTGTTGTGAAGAATGCAAGACT  |
| <i>SITOM1a &amp; d</i> | reverse     | AAACAGTCTTGCATTCTTCACAA  |
| <i>SITOM1b</i>         | forward     | ATTGTCAAAGATGGGGCGAACTCG |
| <i>SITOM1b</i>         | reverse     | AAACCGAGTTCGCCCCATCTTTGA |
| <i>SITOM1c</i>         | forward     | ATTGCCGATTGACATCGCCGGTC  |
| <i>SITOM1c</i>         | reverse     | AAACGACCGGCGATGTCAATCGG  |
